# Supplementary material for: Antiradical Properties of N-Oxide Surfactants—Two in One
Source: MDPI journal article supplement (doi:10.3390/ijms22158040), 2021-07-27
Supplement: s1 [file s1]

# Antiradical Properties of N-Oxide Surfactants – Two in One

Agnieszka Lewińska<sup>1\*</sup>, Julita Kulbacka<sup>2</sup>, Marta Domżał<sup>3</sup>, Maciej Witwicki<sup>1\*</sup>

<sup>1</sup> Faculty of Chemistry, University of Wrocław, Joliot-Curie 14, 50-383 Wrocław, Poland

<sup>2</sup> Department of Molecular and Cellular Biology, Faculty of Pharmacy, Wrocław Medical University, Borowska 211A, 50-367 Wrocław, Poland [julita.kulbacka@umed.wroc.pl](mailto:julita.kulbacka@umed.wroc.pl)

<sup>3</sup> Faculty of Biotechnology, University of Wrocław, Joliot-Curie 14a, 50-383 Wrocław, Poland

\* Correspondence: [agnieszka.lewinska@chem.uni.wroc.pl](mailto:agnieszka.lewinska@chem.uni.wroc.pl), [maciej.witwicki@chem.uni.wroc.pl](mailto:maciej.witwicki@chem.uni.wroc.pl)

## Supplementary Materials

# 1 Pseudo-first-order kinetics

Scavenging reaction between  $DPPH\bullet$  and a surfactant  $surf-H$ :

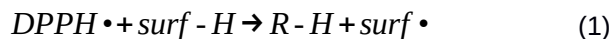

can be described by the following kinetic equation:

$$\frac{d[DPPH\bullet]}{dt} = -k_2[surf-H][DPPH\bullet] \quad (2)$$

In the experiments the initial concentration of  $DPPH\bullet$  in the reaction mixtures was fixed at 0.22 mM for  $DPPH\bullet$  and  $surf-H$  was always present in at least 54-fold excess. Hence,  $[surf-H]$  was approximately constant throughout the entire reaction, so (2) becomes:

$$\frac{d[DPPH\bullet]}{dt} = -k_2[surf-H]_0[DPPH\bullet] = -k_{obs}[DPPH\bullet] \quad (3)$$

where  $k_{obs} = k_2[surf-H]_0$ . This rate equation (3) has the solution:

$$[DPPH\bullet] = [DPPH\bullet]_0 e^{-k_{obs}t} \quad (4)$$

$$\ln[DPPH\bullet] = \ln[DPPH\bullet]_0 - k_{obs}t \quad (5)$$

From (5) the pseudo-first-order constant  $k_{obs}$  can be calculated and from the slope of the linear plots of  $k_{obs}$  vs.  $[surf-H]$  the second-order rate constants  $k_2$  can be determined. These plots are shown below.

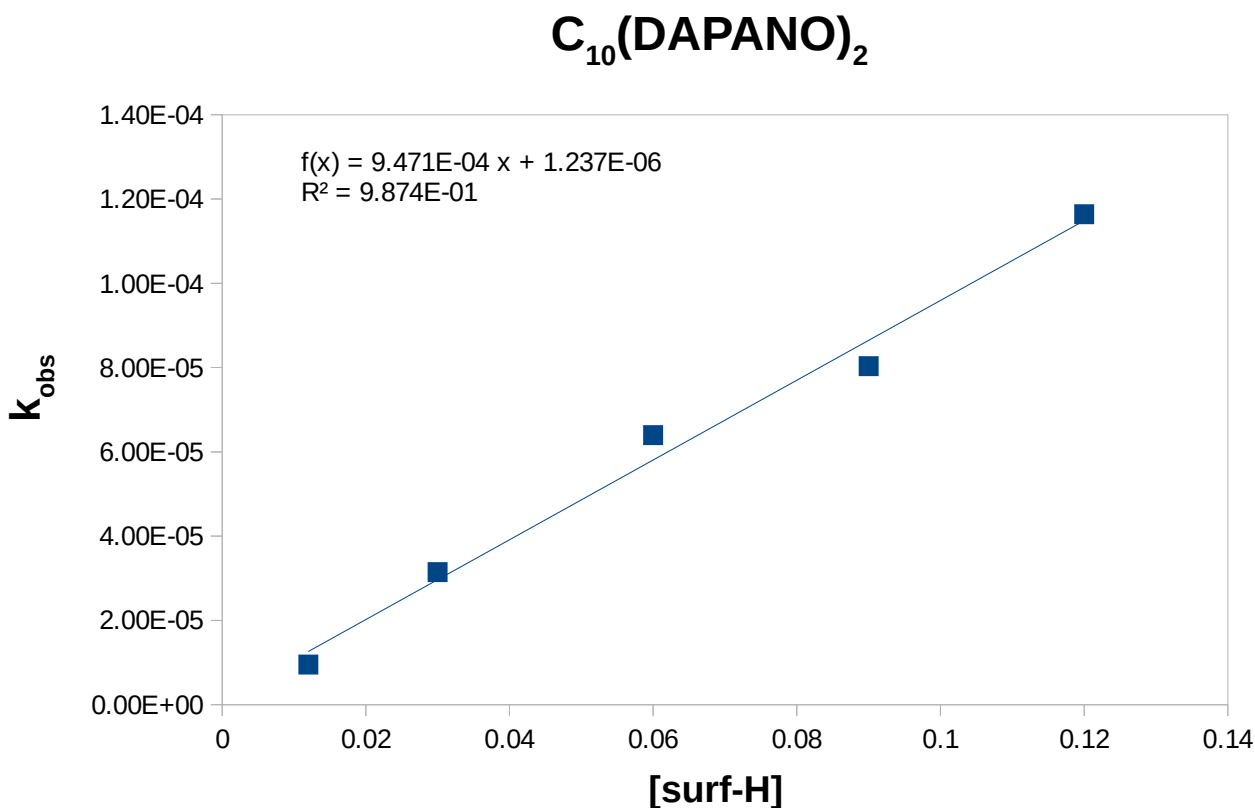

### $C_{12}(\text{DAPANO})_2$

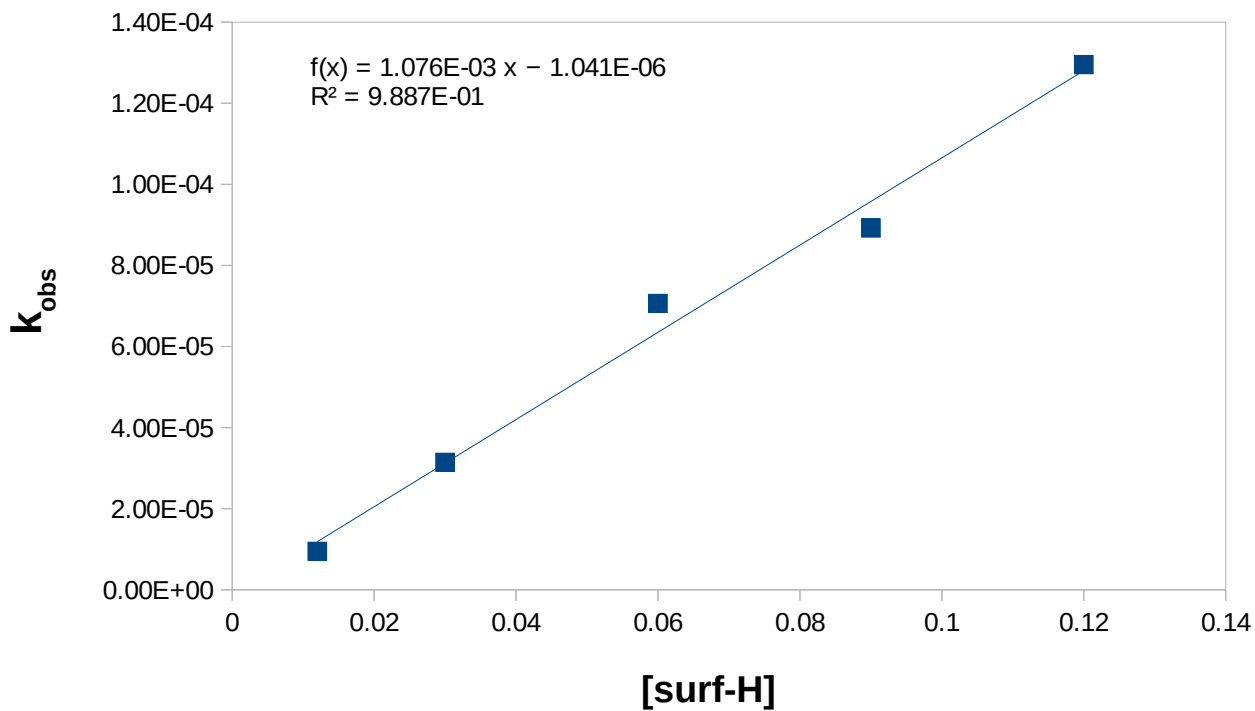

### $C_{14}(\text{DAPANO})_2$

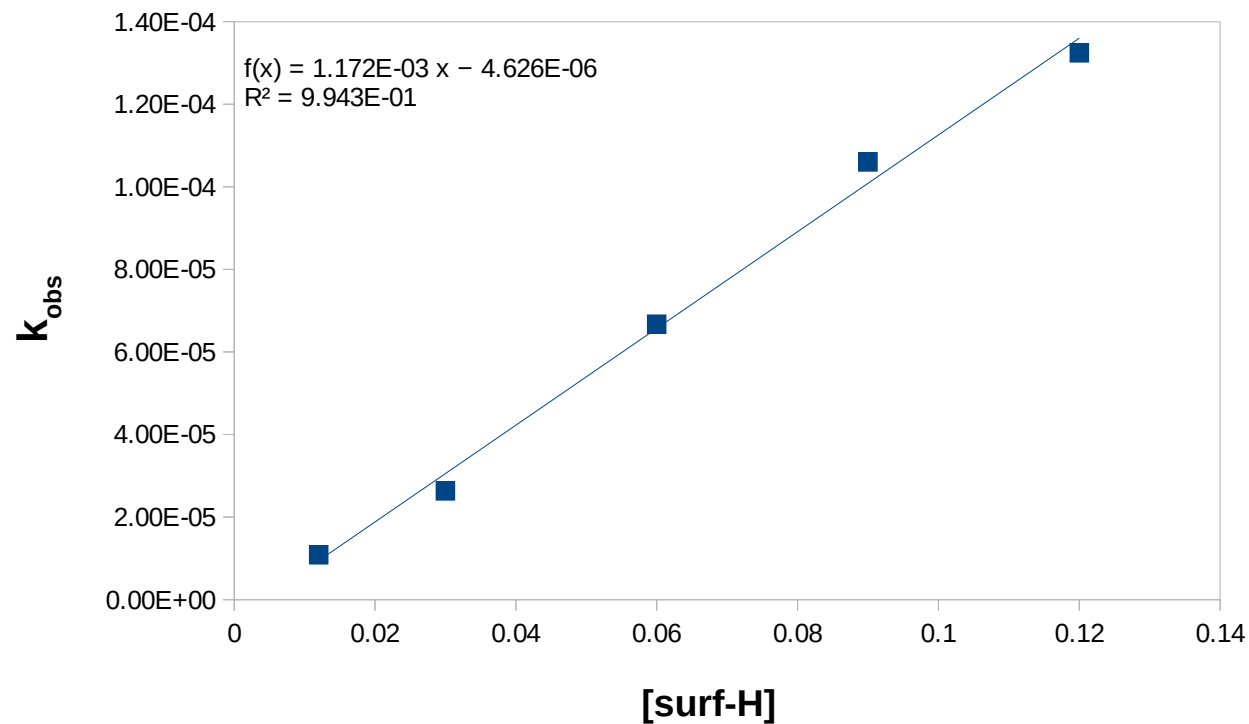

### $C_{16}(DAPANO)_2$

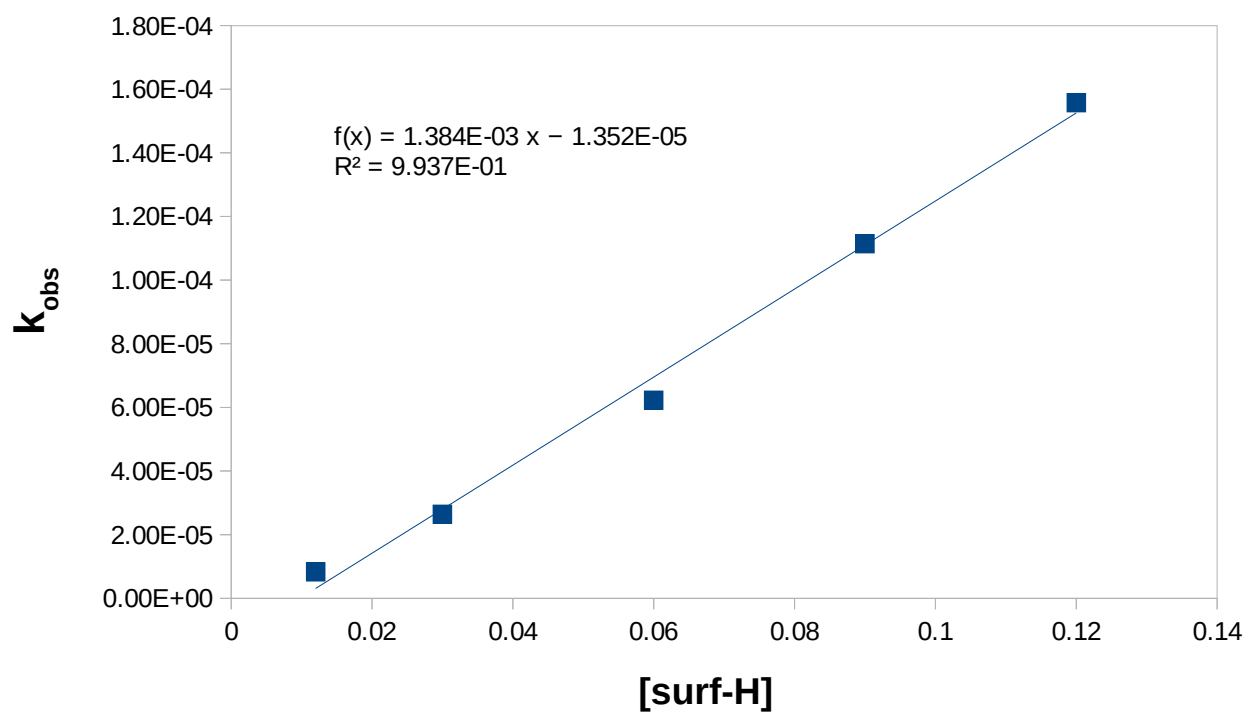

### $C_{10}PDA$

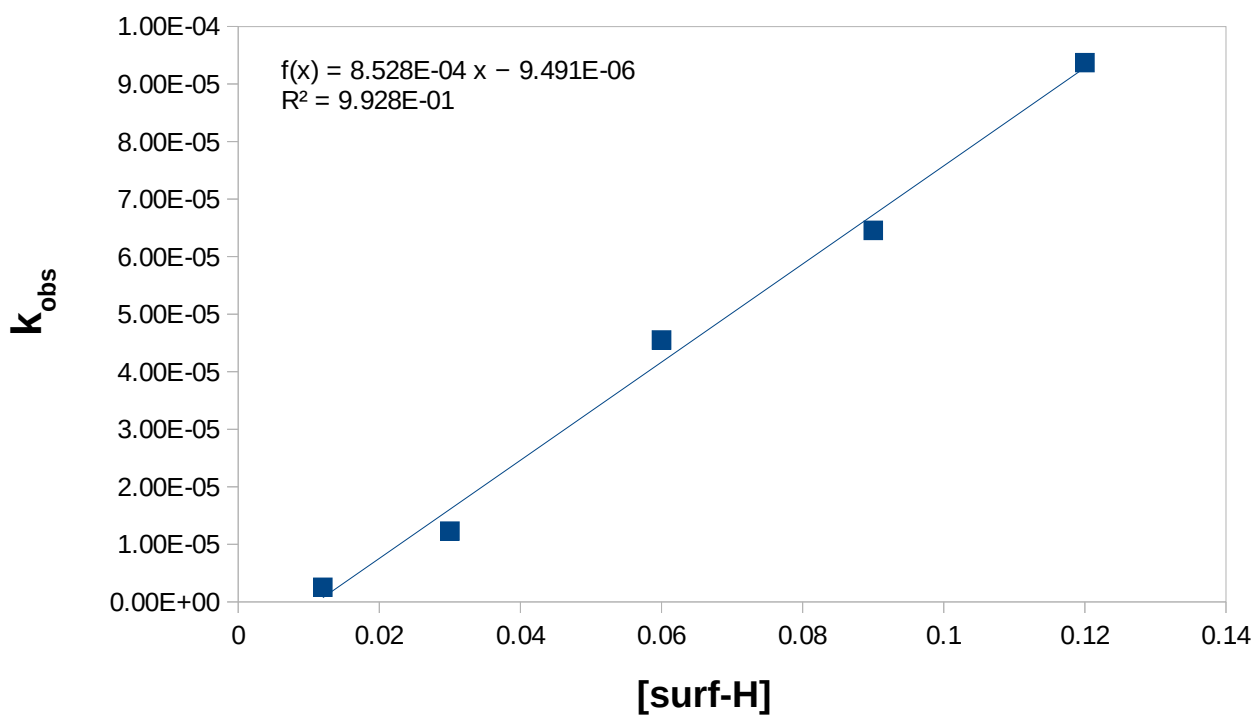

### $C_{12}$ PDA

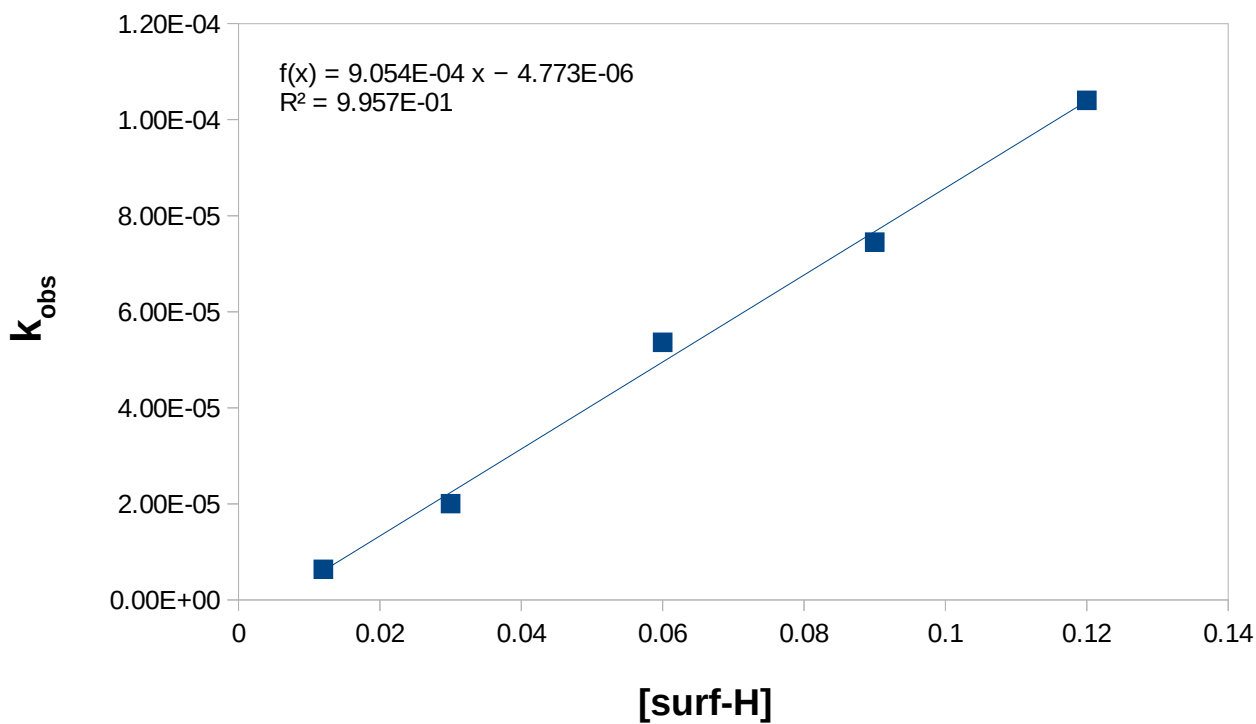

### $C_{14}$ PDA

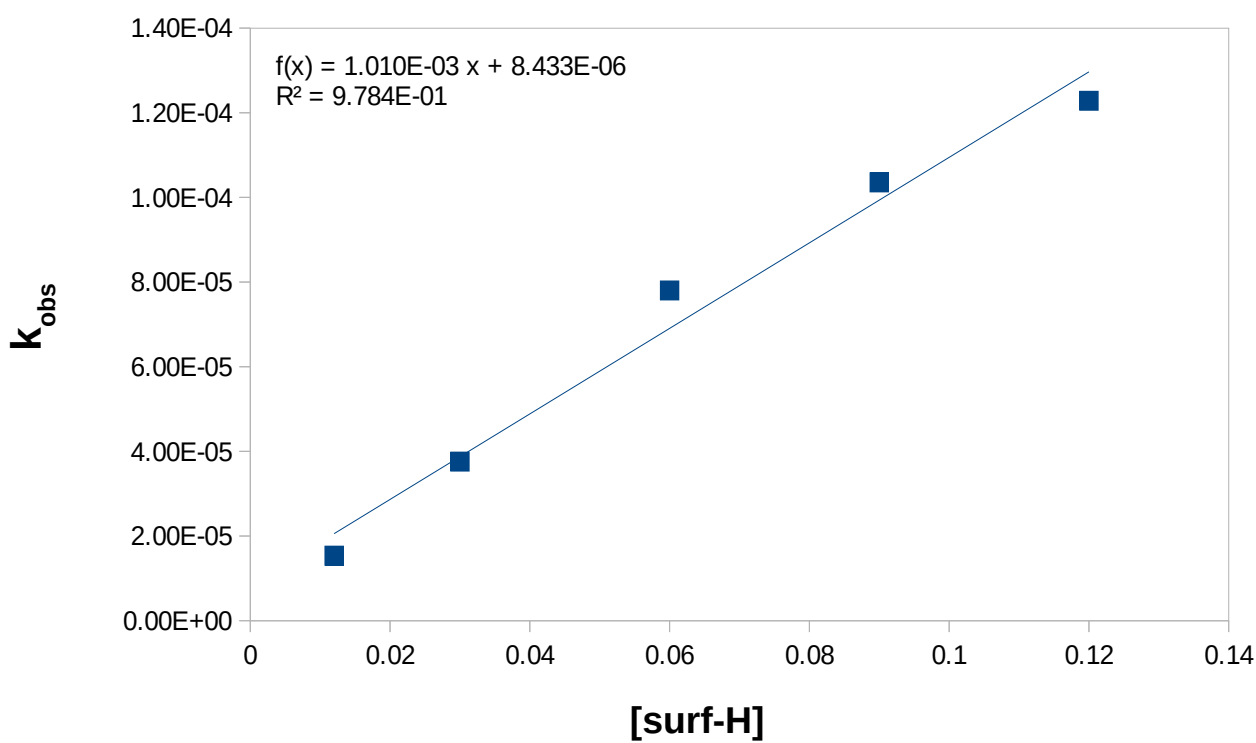

# C<sub>16</sub>PDA

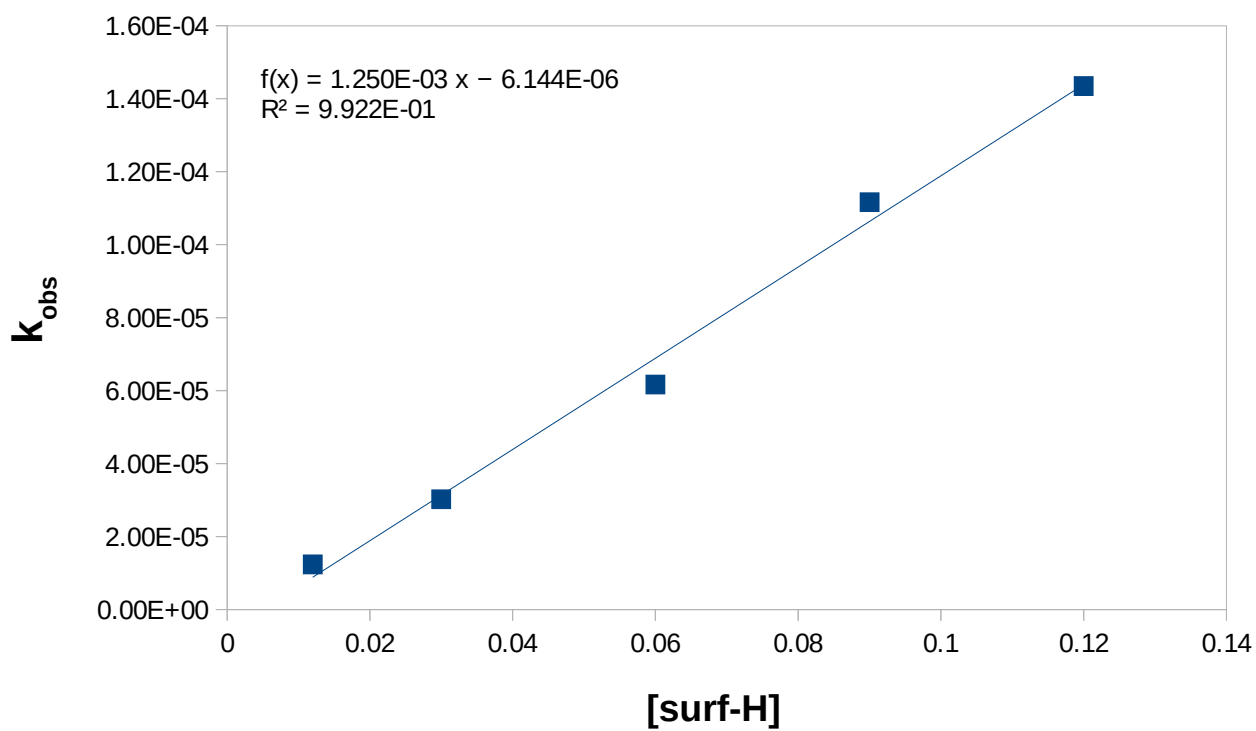

**Table S1.** Bond dissociation enthalpies (BDE) calculated at 298 K.

|                                           |            | BDE [kcal/mol] |        |        |               |
|-------------------------------------------|------------|----------------|--------|--------|---------------|
|                                           |            | B3LYP          | M06-2X | B2PLYP | DLPNO-CCSD(T) |
| <b>C<sub>10</sub>(DAPANO)<sub>2</sub></b> | <b>1a</b>  | 98.41          | 102.19 | 99.41  | 101.26        |
|                                           | <b>1a'</b> | 98.48          | 102.13 | 99.50  | 102.15        |
|                                           | <b>1b</b>  | 97.40          | 101.24 | 98.43  | 100.92        |
|                                           | <b>1b'</b> | 97.69          | 101.59 | 98.78  | 101.33        |
|                                           | <b>2a</b>  | 93.48          | 97.03  | 94.68  | 97.50         |
|                                           | <b>2b</b>  | 94.34          | 98.07  | 95.50  | 98.80         |
|                                           | <b>3a</b>  | 91.51          | 93.38  | 92.43  | 94.39         |
|                                           | <b>3b</b>  | 89.88          | 93.45  | 91.50  | 95.50         |
|                                           | <b>4a</b>  | 91.90          | 93.12  | 92.28  | 93.91         |
|                                           | <b>4b</b>  | 86.81          | 90.78  | 88.45  | 92.47         |
|                                           | <b>5</b>   | 87.39          | 88.91  | 87.00  | 89.26         |
|                                           | <b>6</b>   | 92.77          | 94.98  | 93.50  | 95.85         |
|                                           | <b>7</b>   | 92.42          | 94.46  | 93.07  | 95.60         |
|                                           | <b>8</b>   | 92.55          | 94.70  | 93.29  | 95.05         |
|                                           | <b>9</b>   | 91.85          | 93.98  | 92.53  | 95.13         |
|                                           | <b>10</b>  | 91.91          | 94.11  | 92.65  | 95.22         |
|                                           | <b>11</b>  | 92.45          | 94.62  | 93.14  | 95.00         |
|                                           | <b>12</b>  | 92.25          | 94.36  | 92.89  | 95.51         |
|                                           | <b>13</b>  | 95.48          | 96.91  | 95.56  | 97.54         |
| <b>C<sub>10</sub>PDA</b>                  | <b>1</b>   | 99.06          | 102.52 | 99.93  | 102.30        |
|                                           | <b>1'</b>  | 99.27          | 102.73 | 100.18 | 102.05        |
|                                           | <b>2</b>   | 97.19          | 100.11 | 98.12  | 100.14        |
|                                           | <b>3</b>   | 94.61          | 97.36  | 95.70  | 98.01         |
|                                           | <b>4</b>   | 87.67          | 91.24  | 89.18  | 91.55         |
|                                           | <b>0</b>   | 103.54         | 104.87 | 108.22 | 105.62        |
|                                           | <b>5</b>   | 95.70          | 93.45  | 92.12  | 94.02         |
|                                           | <b>6</b>   | 94.06          | 96.68  | 95.13  | 96.83         |
|                                           | <b>7</b>   | 94.18          | 96.36  | 94.85  | 97.41         |
|                                           | <b>8</b>   | 94.03          | 96.47  | 94.97  | 97.32         |
|                                           | <b>9</b>   | 106.43         | 96.84  | 95.37  | 109.66        |
|                                           | <b>10</b>  | 94.00          | 96.20  | 94.73  | 97.32         |
|                                           | <b>11</b>  | 94.03          | 96.25  | 94.75  | 97.31         |
|                                           | <b>12</b>  | 93.84          | 96.01  | 94.51  | 96.60         |
|                                           | <b>13</b>  | 97.92          | 99.34  | 97.98  | 99.41         |
| <b>phenol</b>                             |            | 81.85          | 87.91  | 85.05  | 87.47         |

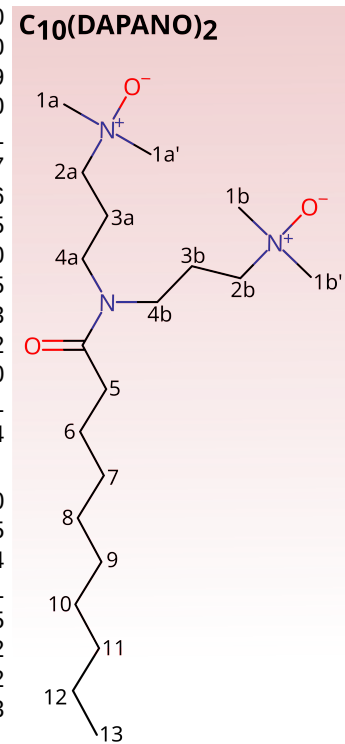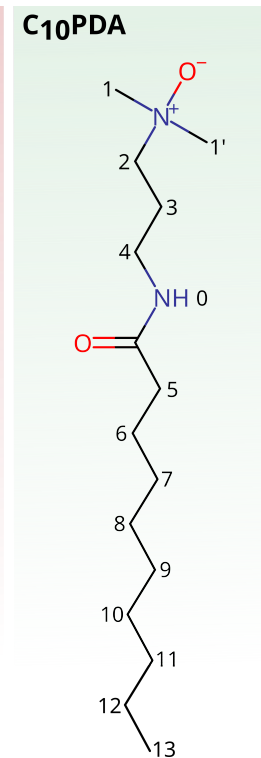

**Table S2.** Ionisation potentials (IP) calculated at 298 K.

|                    | IP [kcal/mol] |        |        |               |
|--------------------|---------------|--------|--------|---------------|
|                    | B3LYP         | M06-2X | B2PLYP | DLPNO-CCSD(T) |
| $C_{10}(DAPANO)_2$ | 143.93        | 145.87 | 142.90 | 147.77        |
| $C_{10}PDA$        | 143.29        | 145.48 | 143.15 | 148.93        |

**Table S3.** The Gibbs free energies ( $\Delta G$ ) calculated at 298 K for the hydrogen atom transfer and one-electron transfer process. For the hydrogen atom transfer the most stable radical forms of the surfactants were used.

|                        |                                                                              | $\Delta G$ [kcal/mol] |        |        |               |
|------------------------|------------------------------------------------------------------------------|-----------------------|--------|--------|---------------|
|                        |                                                                              | B3LYP                 | M06-2X | B2PLYP | DLPNO-CCSD(T) |
| Hydrogen atom transfer | $DPPH\cdot + C_{10}(DAPANO)_2 \rightarrow DPPH-H + \cdot C_{10}(DAPANO)_2$   | 10.01                 | 9.26   | 9.57   | 11.82         |
|                        | $\cdot OH + C_{10}(DAPANO)_2 \rightarrow H_2O + \cdot C_{10}(DAPANO)_2$      | -29.98                | -30.43 | -30.32 | -29.19        |
|                        | $DPPH\cdot + C_{10}PDA \rightarrow DPPH-H + \cdot C_{10}PDA$                 | 22.85                 | 18.32  | 19.22  | 21.11         |
|                        | $\cdot OH + C_{10}PDA \rightarrow H_2O + \cdot C_{10}PDA$                    | -17.14                | -21.37 | -20.67 | -19.90        |
| One-electron transfer  | $DPPH\cdot + C_{10}(DAPANO)_2 \rightarrow DPPH^- + \cdot C_{10}(DAPANO)_2^+$ | 36.71                 | 36.14  | 36.29  | 45.56         |
|                        | $\cdot OH + C_{10}(DAPANO)_2 \rightarrow OH^- + \cdot C_{10}(DAPANO)_2^+$    | 30.02                 | 31.27  | 31.11  | 46.63         |
|                        | $DPPH\cdot + C_{10}PDA \rightarrow DPPH^- + \cdot C_{10}PDA^+$               | 37.01                 | 36.69  | 37.48  | 47.67         |
|                        | $\cdot OH + C_{10}PDA \rightarrow OH^- + \cdot C_{10}PDA^+$                  | 30.32                 | 31.81  | 32.30  | 48.73         |



Table S4. Summary of the theoretical calculations.

|                                                        |            | BP86          | B3LYP         | E [a.u.]<br>M06-2X | B2PLYP        | DLPNO-CCSD(T) | ZPE [au]<br>BP86 | TTC [a.u.]<br>BP86 | T × S [a.u.]<br>BP86 |
|--------------------------------------------------------|------------|---------------|---------------|--------------------|---------------|---------------|------------------|--------------------|----------------------|
| <b>C<sub>10</sub>(DAPANO)<sub>2</sub></b>              |            | -1178.3967962 | -1178.3105389 | -1177.7566411      | -1177.2230630 | -1175.8312073 | 0.6085222        | 0.0305350          | 0.0886904            |
| <b>•C<sub>10</sub>(DAPANO)<sub>2</sub></b>             | <b>1a</b>  | -1177.7274135 | -1177.6386990 | -1177.0827860      | -1176.5531924 | -1175.1572002 | 0.5947238        | 0.0306920          | 0.0898144            |
|                                                        | <b>1a'</b> | -1177.7271196 | -1177.6385926 | -1177.0828826      | -1176.5530478 | -1175.1557787 | 0.5947260        | 0.0306854          | 0.0896094            |
|                                                        | <b>1b</b>  | -1177.7287181 | -1177.6403231 | -1177.0843096      | -1176.5547645 | -1175.1577674 | 0.5947402        | 0.0306883          | 0.0895154            |
|                                                        | <b>1b'</b> | -1177.7281541 | -1177.6399260 | -1177.0838013      | -1176.5542646 | -1175.1571582 | 0.5948988        | 0.0305823          | 0.0891883            |
|                                                        | <b>2a</b>  | -1177.7294755 | -1177.6442811 | -1177.0887398      | -1176.5584574 | -1175.1609288 | 0.5953186        | 0.0278213          | 0.0849904            |
|                                                        | <b>2b</b>  | -1177.7347870 | -1177.6463917 | -1177.0905511      | -1176.5606204 | -1175.1623233 | 0.5950073        | 0.0316118          | 0.0919377            |
|                                                        | <b>3a</b>  | -1177.7328810 | -1177.6474058 | -1177.0945304      | -1176.5620166 | -1175.1658641 | 0.5942699        | 0.0288521          | 0.0876458            |
|                                                        | <b>3b</b>  | -1177.7371047 | -1177.6503008 | -1177.0947206      | -1176.5638090 | -1175.1643900 | 0.5932698        | 0.0301524          | 0.0885345            |
|                                                        | <b>4a</b>  | -1177.7449691 | -1177.6506305 | -1177.0987966      | -1176.5661011 | -1175.1704662 | 0.5956243        | 0.0313408          | 0.0910463            |
|                                                        | <b>4b</b>  | -1177.7447685 | -1177.6572696 | -1177.1010427      | -1176.5707316 | -1175.1712977 | 0.5948959        | 0.0305951          | 0.0892603            |
|                                                        | <b>5</b>   | -1177.7405428 | -1177.6544013 | -1177.1020774      | -1176.5710999 | -1175.1744583 | 0.5959751        | 0.0275693          | 0.0844222            |
|                                                        | <b>6</b>   | -1177.7290920 | -1177.6445061 | -1177.0911015      | -1176.5594279 | -1175.1626421 | 0.5943021        | 0.0279312          | 0.0850409            |
|                                                        | <b>7</b>   | -1177.7289043 | -1177.6452591 | -1177.0921016      | -1176.5603015 | -1175.1632357 | 0.5944594        | 0.0279599          | 0.0853008            |
|                                                        | <b>8</b>   | -1177.7287916 | -1177.6450101 | -1177.0916910      | -1176.5599208 | -1175.1640710 | 0.5943865        | 0.0280024          | 0.0854697            |
|                                                        | <b>9</b>   | -1177.7289802 | -1177.6452444 | -1177.0919604      | -1176.5602454 | -1175.1630698 | 0.5943665        | 0.0271397          | 0.0829469            |
|                                                        | <b>10</b>  | -1177.7290367 | -1177.6453026 | -1177.0918987      | -1176.5601913 | -1175.1630579 | 0.5945036        | 0.0271427          | 0.0830934            |
|                                                        | <b>11</b>  | -1177.7289484 | -1177.6451554 | -1177.0918139      | -1176.5601409 | -1175.1641416 | 0.5943132        | 0.0280598          | 0.0859555            |
|                                                        | <b>12</b>  | -1177.7292901 | -1177.6453896 | -1177.0921259      | -1176.5604412 | -1175.1632233 | 0.5940866        | 0.0281891          | 0.0861355            |
|                                                        | <b>13</b>  | -1177.7231058 | -1177.6395260 | -1177.0873493      | -1176.5554829 | -1175.1592913 | 0.5937822        | 0.0277840          | 0.0844258            |
| <b>•C<sub>10</sub>(DAPANO)<sub>2</sub><sup>+</sup></b> |            | -1178.1944740 | -1178.0799553 | -1177.5229670      | -1176.9941239 | -1175.5945112 | 0.6070474        | 0.0307992          | 0.0895352            |
| <b>C<sub>10</sub>PDA</b>                               |            | -851.1872939  | -851.1404485  | -850.7231146       | -850.3410494  | -849.3237147  | 0.4500565        | 0.0221474          | 0.0717135            |
| <b>•C<sub>10</sub>PDA</b>                              | <b>1</b>   | -850.5175405  | -850.4676002  | -850.0487633       | -849.6703694  | -848.6480774  | 0.4363895        | 0.0221991          | 0.0723454            |
|                                                        | <b>1'</b>  | -850.5171468  | -850.4672404  | -850.0484001       | -849.6699488  | -848.6484557  | 0.4363654        | 0.0221975          | 0.0723325            |
|                                                        | <b>2</b>   | -850.5226098  | -850.4717268  | -850.0537405       | -849.6743997  | -848.6526641  | 0.4366527        | 0.0230698          | 0.0748118            |
|                                                        | <b>3</b>   | -850.5238781  | -850.4736022  | -850.0558874       | -849.6760238  | -848.6538204  | 0.4350047        | 0.0224913          | 0.0732458            |
|                                                        | <b>4</b>   | -850.5361067  | -850.4860290  | -850.0669982       | -849.6877706  | -848.6654736  | 0.4367742        | 0.0220815          | 0.0724845            |
|                                                        | <b>0</b>   | -850.5055364  | -850.4605908  | -850.0451334       | -849.6572837  | -848.6429123  | 0.4356308        | 0.0230818          | 0.0752352            |
|                                                        | <b>5</b>   | -850.5316073  | -850.4744372  | -850.0646973       | -849.6842936  | -848.6627480  | 0.4370821        | 0.0229817          | 0.0746583            |
|                                                        | <b>6</b>   | -850.5222623  | -850.4748827  | -850.0573686       | -849.6773197  | -848.6560975  | 0.4354404        | 0.0224501          | 0.0730195            |
|                                                        | <b>7</b>   | -850.5228695  | -850.4747829  | -850.0579764       | -849.6778659  | -848.6552649  | 0.4354982        | 0.0224829          | 0.0732855            |
|                                                        | <b>8</b>   | -850.5227245  | -850.4750252  | -850.0578096       | -849.6776880  | -848.6554238  | 0.4354703        | 0.0225293          | 0.0734720            |
|                                                        | <b>9</b>   | -850.5229053  | -850.4562176  | -850.0581729       | -849.6780025  | -848.6367206  | 0.4354886        | 0.0234623          | 0.0767508            |
|                                                        | <b>10</b>  | -850.5229290  | -850.4750548  | -850.0582195       | -849.6780508  | -848.6554018  | 0.4354296        | 0.0225485          | 0.0733284            |
|                                                        | <b>11</b>  | -850.5228943  | -850.4750341  | -850.0581610       | -849.6780496  | -848.6554455  | 0.4354377        | 0.0225657          | 0.0733143            |
|                                                        | <b>12</b>  | -850.5232337  | -850.4752659  | -850.0584727       | -849.6783477  | -848.6565026  | 0.4352731        | 0.0226560          | 0.0734867            |
|                                                        | <b>13</b>  | -850.5168371  | -850.4691529  | -850.0535627       | -849.6732182  | -848.6524282  | 0.4357228        | 0.0226017          | 0.0733402            |
| <b>•C<sub>10</sub>PDA<sup>+</sup></b>                  |            | -850.9655535  | -850.9111990  | -850.4903835       | -850.1120322  | -849.0854771  | 0.4486158        | 0.0226871          | 0.0740626            |
| <b>phenol</b>                                          |            | -307.6189992  | -307.6027067  | -307.4664158       | -307.3368484  | -306.9399477  | 0.1011015        | 0.0057237          | 0.0358003            |
| <b>phenol•</b>                                         |            | -306.9738902  | -306.9582948  | -306.8163531       | -306.6908902  | -306.2889630  | 0.0887429        | 0.0054745          | 0.0361121            |
| <b>DPPh•</b>                                           |            | -1418.6441224 | -1418.4479691 | -1417.8802788      | -1417.3771153 | -1415.5825053 | 0.2786944        | 0.0242914          | 0.0773988            |
| <b>DPPh-H</b>                                          |            | -1419.2760072 | -1419.0797030 | -1418.5116385      | -1418.0053798 | -1416.2119745 | 0.2911241        | 0.0242367          | 0.0763551            |
| <b>DPPh•</b>                                           |            | -1418.8159720 | -1418.6174190 | -1418.0537221      | -1417.5455846 | -1415.7439534 | 0.2778400        | 0.0241326          | 0.0761414            |
| <b>•OH</b>                                             |            | -75.7736546   | -75.7736673   | -75.7396096        | -75.7238826   | -75.6434155   | 0.0081207        | 0.0023605          | 0.0202550            |
| <b>H<sub>2</sub>O</b>                                  |            | -76.4763367   | -76.4744579   | -76.4375391        | -76.4190458   | -76.3415606   | 0.0204396        | 0.0028365          | 0.0221169            |
| <b>OH•</b>                                             |            | -75.9605418   | -75.9575736   | -75.9226150        | -75.9024033   | -75.8049682   | 0.0083272        | 0.0023605          | 0.0195735            |
| <b>H•</b>                                              |            | -0.5000401    | -0.5023090    | -0.4983070         | -0.4987551    | -0.4999351    | —                | —                  | —                    |

ZPE Zero point energy  
TTC Total thermal correction (vibrational, rotational and translational correction)

T 298.15 K  
p 1 atm  
k<sub>B</sub> × T [a.u.] 0.0009442
